# Supplementary material for: Cholesterol enhances influenza binding avidity by controlling nanoscale receptor clustering
Source: Royal Society of Chemistry journal article supplement (doi:10.1039/c7sc03236f), 2018-01-01
Supplement: c7sc03236f1.pdf [file c7sc03236f1.pdf]

## Supplementary Information for Cholesterol enhances influenza binding avidity by controlling nanoscale receptor clustering

### Supplementary Methods:

**Chemicals.** Dioleoyl phosphatidylethanolamine (DOPE), Palmitoyl oleoyl phosphatidylcholine (POPC), cholesterol, stigmasterol, 7-dehydrocholesterol, desmosterol, and lanosterol were all purchased from Avanti Polar Lipids (Alabaster, AL). 5-cholesten-3-one and ergosterol were purchased from Sigma-Aldrich (St. Louis, MO). The viral target receptor, disialoganglioside GD1a from bovine brain (Cer-Glc-Gal(NeuAc)-GalNAc-Gal-NeuAc), was also purchased from Sigma-Aldrich. Fluorophores Texas Red-1,2-dihexadecanoyl- *sn*-glycero-3-phosphoethanolamine (TR-DHPE) and Oregon Green-1,2-dihexadecanoyl- *sn*-glycero-3-phosphoethanolamine (OG-DHPE) were purchased from Thermo Fisher Scientific (Waltham, MA).

**Dissociation Rate Analysis in Simulations.** As described previously<sup>1</sup>, dissociation was modeled as a two-state reaction which follows a Poisson distribution and thus has the following probabilities:

$$P_{\text{dissociate}}(t = \tau | k_{\text{off}}) = k_{\text{off}} e^{-k_{\text{off}} \tau}$$

$$P_{\text{stay}}(t = 0, \dots, \tau | k_{\text{off}}) = e^{-k_{\text{off}} \tau}$$

Contact lifetime analysis result in a set of  $N$  identified contact events,  $n$  of which terminate by the end of the simulation with lengths  $[t_1, \dots, t_n]$  and  $N-n$  of which are still in contact at the end of the simulation with partial contact lifetimes with lengths  $[T_1, \dots, T_{N-n}]$ . Assuming a uniform prior for  $k_{\text{off}}$ , the probability density function for  $k_{\text{off}}$  thus follows:

$$P(k_{\text{off}} | N, t_1, \dots, t_n, n, T_1, \dots, T_{N-n}) = \frac{\theta^{n+1}}{n!} k_{\text{off}}^n \exp(-k_{\text{off}} \theta)$$

$$\theta = \sum_{i=1}^n t_i + \sum_{j=1}^{N-n} T_j$$

where

| <b>Mol %<br/>Cholesterol</b> | <b>Mol % GD1A</b> |         |         |          | <b>Membrane<br/>Component</b> |
|------------------------------|-------------------|---------|---------|----------|-------------------------------|
|                              | 1 mol %           | 2 mol % | 4 mol % | 10 mol % |                               |
| 0 mol %                      | 3                 | 7       | 14      | 36       | GD1a                          |
|                              | 72                | 72      | 72      | 72       | DOPE                          |
|                              | 285               | 281     | 274     | 252      | POPC                          |
|                              | 19049             | 18794   | 18383   | 17146    | PW                            |
|                              |                   |         |         |          |                               |
| 10 mol %                     | 3                 | 7       | 14      | 36       | GD1a                          |
|                              | 36                | 36      | 36      | 36       | CHOL                          |
|                              | 72                | 72      | 72      | 72       | DOPE                          |
|                              | 249               | 245     | 238     | 216      | POPC                          |
|                              | 19199             | 18929   | 18563   | 17270    | PW                            |
| 20 mol %                     | 3                 | 7       | 14      | 36       | GD1a                          |
|                              | 72                | 72      | 72      | 72       | CHOL                          |
|                              | 72                | 72      | 72      | 72       | DOPE                          |
|                              | 212               | 209     | 202     | 180      | POPC                          |
|                              | 19351             | 19061   | 18634   | 17338    | PW                            |

**Supplementary Table 1: Table of simulated lipid bilayer compositions.**

Listed values represent the number of phospholipids (DOPE, POPC), GD1a and cholesterol (CHOL) molecules present in each monolayer of each bilayer simulation. In all experimental conditions, the mol % of DOPE was held constant at 20 mol %. GD1a concentration was varied between 1, 2, 4 and 10 mol % and cholesterol was varied between 0, 10 and 20 mol %. The remaining mol % was POPC. Membranes of each composition were constructed with INSANE<sup>2</sup>, and then the simulation box was solvated with a polarizable water model (PW) and 150 mM NaCl.

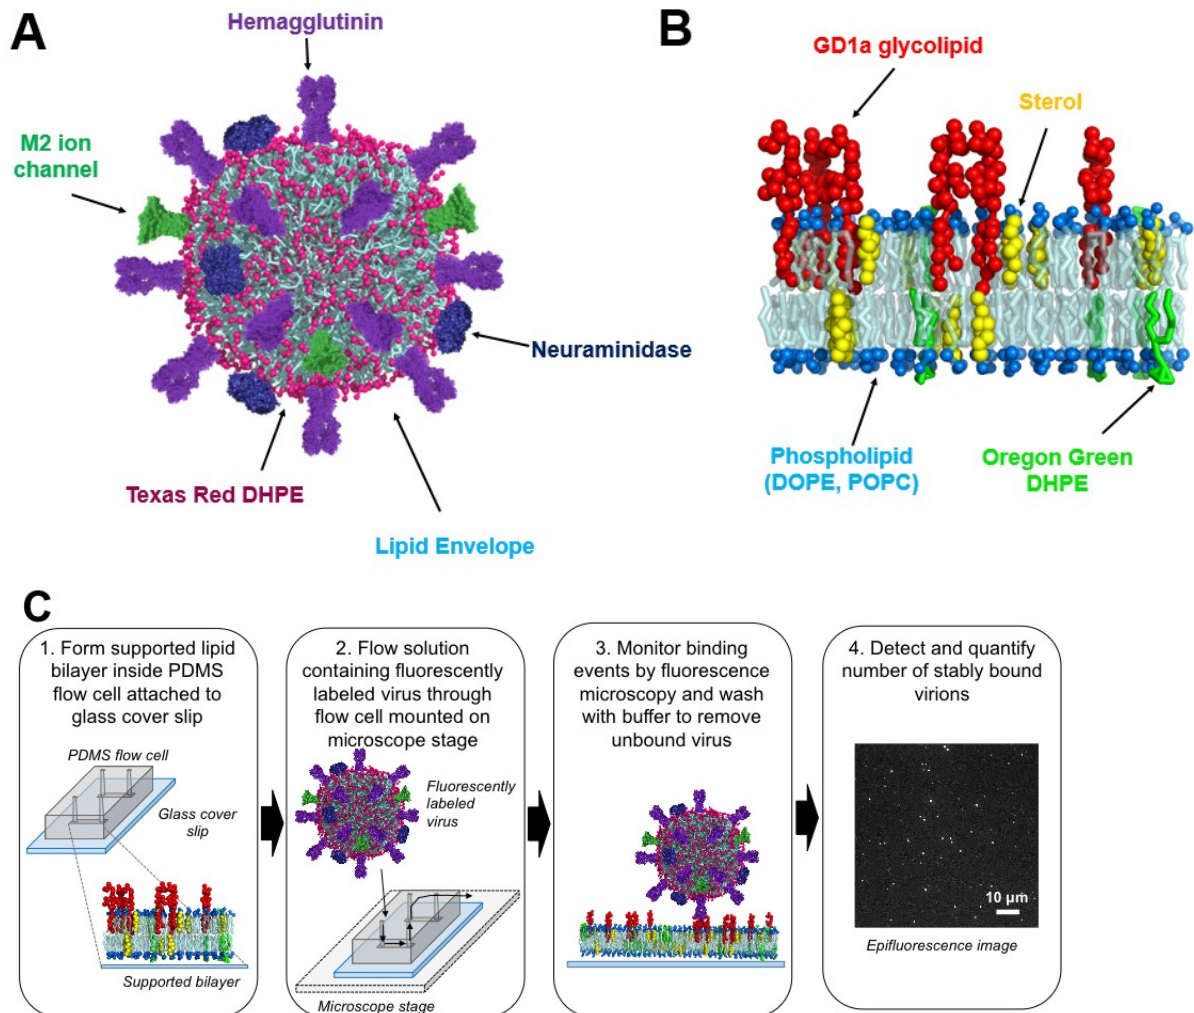

**Supplementary Figure 1: Schematics of virus, bilayer, and in-vitro binding assay.** An influenza virion is schematized in part (A), a target bilayer in part (B), and the single-virion binding assay in part (C). We do not detect a preferential association of cholesterol with GD1a versus phospholipids in simulations of supported lipid bilayers with compositions matching those used experimentally.

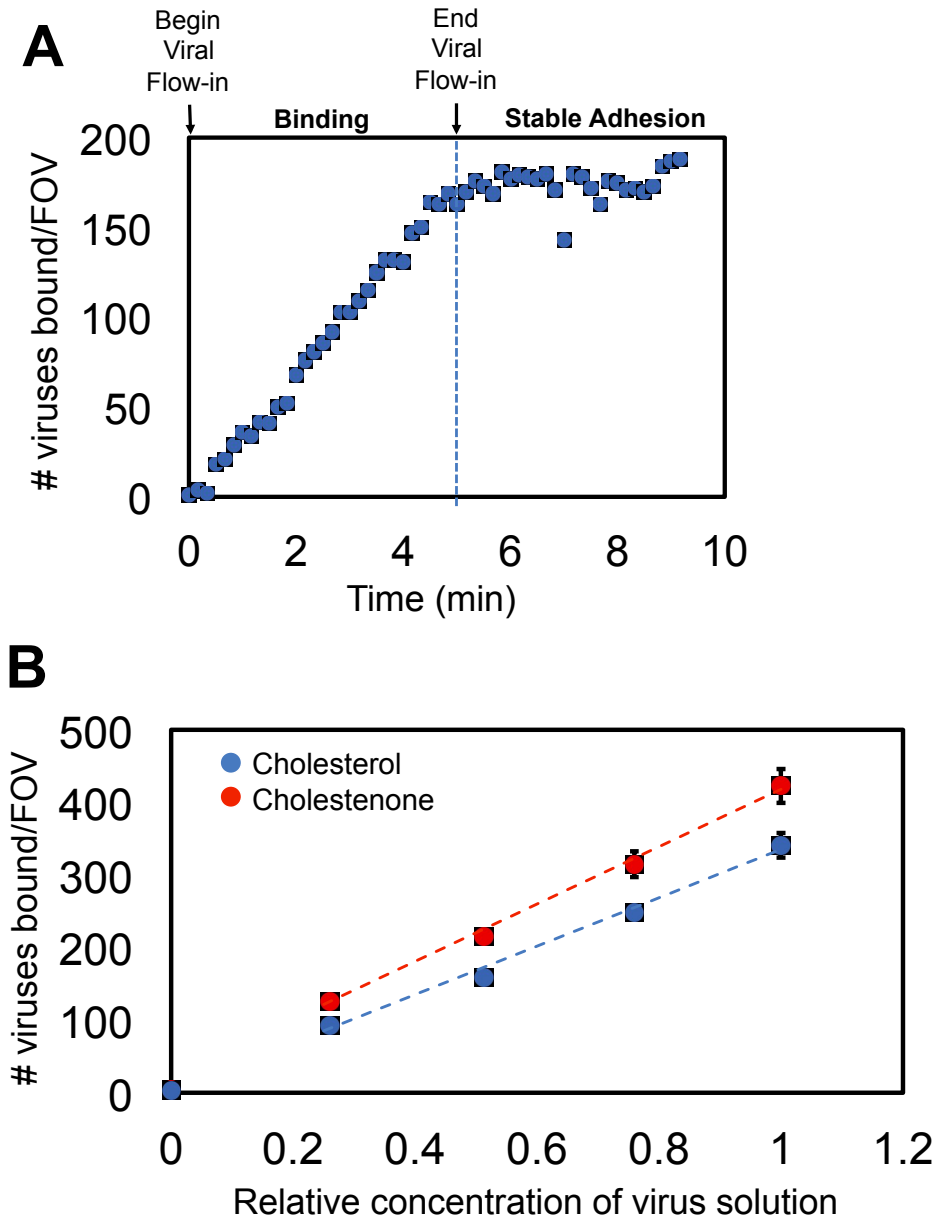

**Supplementary Figure 2: Viral binding to target membranes is linear as a function of time and viral concentration.** Viral binding is plotted as a function of time (A) as measured via fluorescence microscopy. A virus-containing solution was flowed through an imaging chamber containing a target membrane with 10 mol % cholesterol at a constant rate for 5 minutes (dotted line). At 5 minutes, the imaging chamber was washed with virus-free buffer. Binding increased in a linear fashion over time and did not reach saturation within the experimental time window. Once bound, virions remained stably attached to the target membrane. Viral binding is also plotted as a function of viral concentration after 2.5 minutes of incubation (B) with target membranes containing 10 mol % cholesterol (blue) or cholestenone (red). Results are representative of conditions tested using the single-virus binding assay.

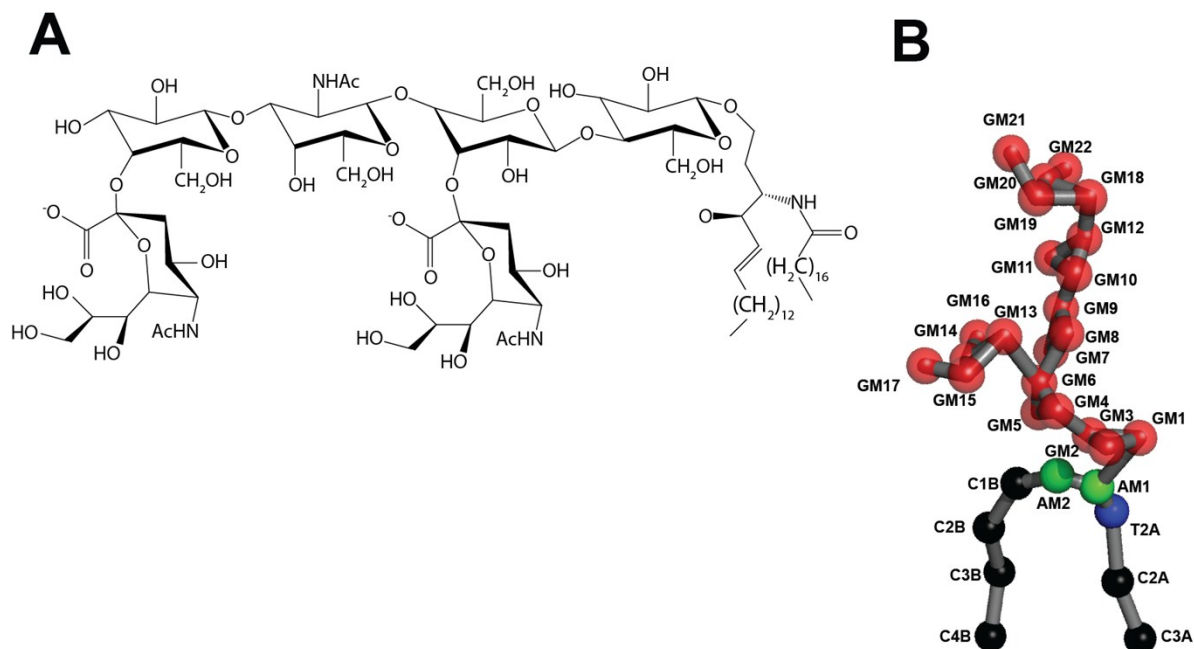

**Supplementary Figure 3: Chemical structure of GD1a (A) and GD1a topology constructed with MARTINI beads for coarse-grained MD simulations (B).**

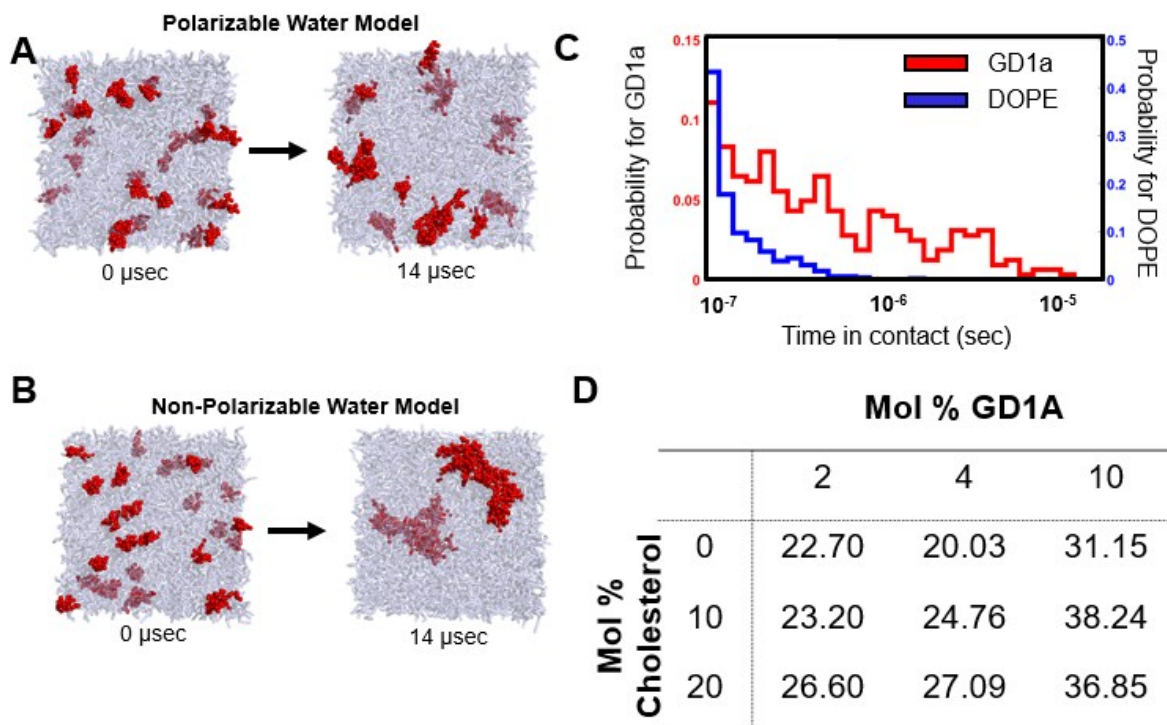

**Supplementary Figure 4: Dynamic association-dissociation behavior of simulated GD1a molecules in membranes.**

(A) Snapshots of membrane containing 4 mol% GD1a and no sterol simulated with a polarizable water model. The use of a polarizable CG water model drastically reduced artificial, simulation-induced clustering. Snapshots are representative of 4 mol% GD1a simulations with 0, 10 or 20 mol% cholesterol. Red = GD1a; Grey=Phospholipids. (B) Snapshots of membranes containing 4 mol% GD1a and no sterol simulated with a non-polarizable water model. A single cluster of all GD1a formed and remained throughout the simulation. (C) Histogram of contact lifetimes between GD1a pairs (blue) and DOPE pairs (red) for simulated membranes containing 4 mol% GD1a and 10 mol% cholesterol. GD1a shows preferential self-association, and pairwise GD1a-GD1a contacts persist significantly longer than phospholipid-phospholipid contacts do. (D) Table of mean contact lifetimes in nanoseconds between GD1a pairs at different mol% GD1a and cholesterol. For membranes containing 2, 4 or 10 mol% GD1a, cholesterol increases mean lifetime.

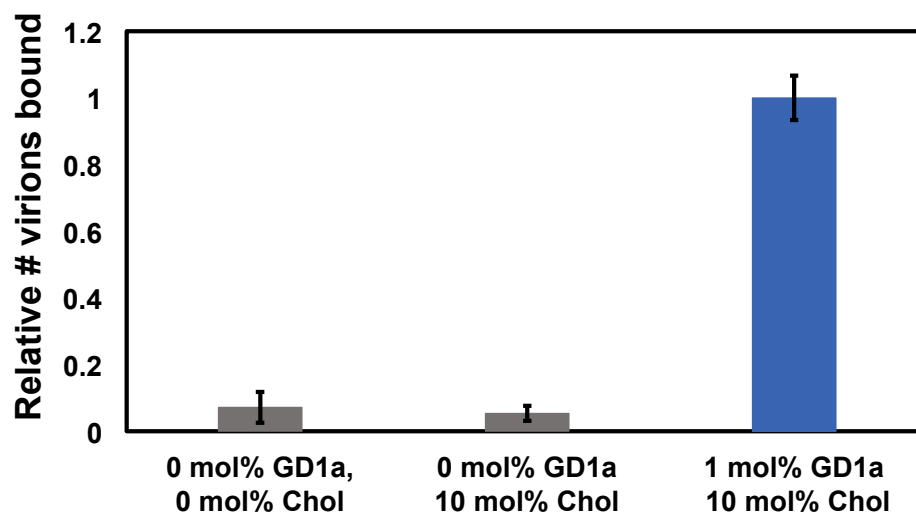

**Supplementary Figure 5: Negligible viral binding occurs in the absence of GD1a receptor.** Relative viral binding to target membranes containing no GD1a and either 0 mol% or 10 mol% cholesterol is plotted and compared to binding to membranes containing 1 mol% GD1a and 10 mol% cholesterol.

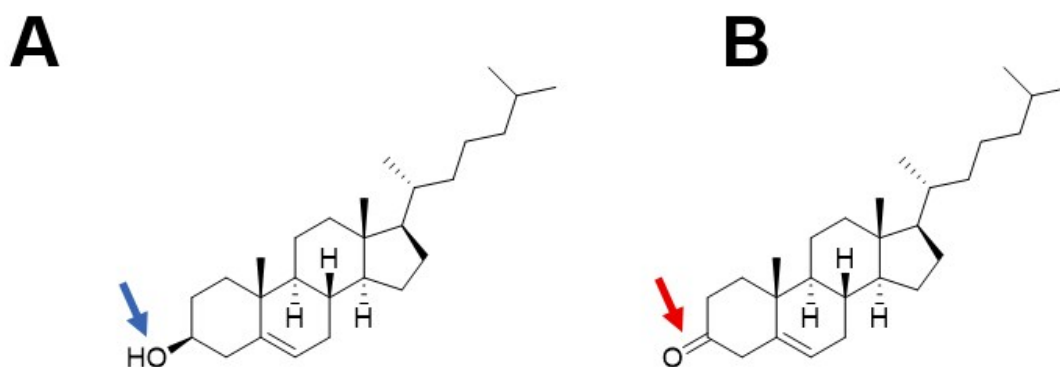

**Supplementary Figure 6: Chemical structures of Cholesterol (A) and Cholestenone (B).** As noted by the arrows, the only difference between the two structures is the presence of a hydroxyl group versus a ketone.

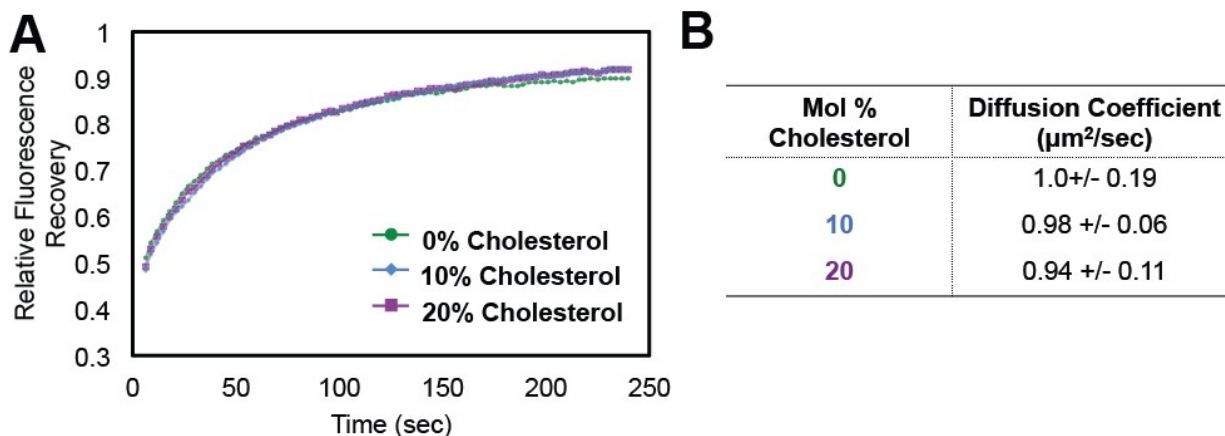

**Supplementary Figure 7: Fluorescence Recovery After Photobleaching (FRAP) of supported lipid bilayers with varying mol % cholesterol.** (A) Relative fluorescence recovery after 20-second bleaching of Oregon Green-DHPE in supported bilayers of identical composition (1 mol % GD1a, 0.5 mol % OG-DHPE, 20 mol % DOPE, 0-20 mol % cholesterol and remaining mol % POPC) to those used for influenza binding experiments. (B) Diffusion coefficients for OG-DHPE calculated by fitting fluorescence recovery curves. Fluorescence recovery timescales and thus diffusion coefficients of OG-DHPE in the bilayer were not statistically different for bilayers containing 0, 10, and 20 mol % cholesterol.

## References

1. P. M. Kasson, D. L. Ensign and V. S. Pande, *J Am Chem Soc*, 2009, **131**, 1338-1340.
2. T. A. Wassenaar, H. I. Ingolfsson, R. A. Bockmann, D. P. Tieleman and S. J. Marrink, *J Chem Theory Comput*, 2015, **11**, 2144-2155.
